# Supplementary material
Source: Elsevier journal article supplement (https://www.sciencedirect.com/science/article/pii/S0301054616300945)
Supplement: mmc1 [file S0301054616300945:mmc1.pdf]

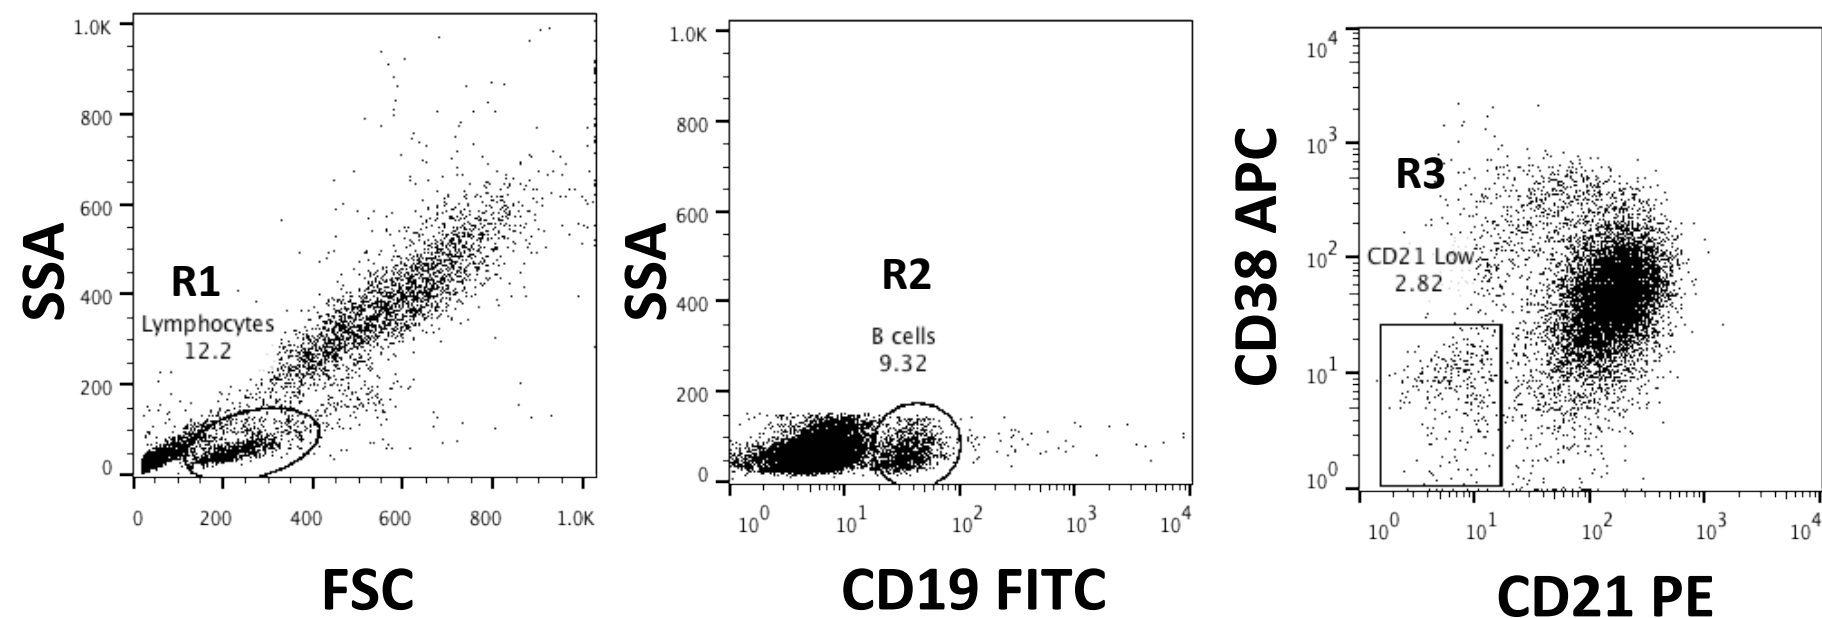

**Supplementary figure 1.** Analysis of CD21 low B cell subpopulation by flow cytometry. (a) CD19<sup>+</sup> B cells (R2) were gated within the lymphocyte side- and forward-scatter region (R1). The CD21 low (R3) B cells are CD19<sup>+</sup> CD21<sup>low</sup> CD38<sup>low</sup>.

**Supplementary table 1.** Percentages and absolute numbers of CD21 low B cell subpopulation in 2 group of healthy donors.

| Age group<br>years | Total number<br>of subjects | Gender ratio<br>F/M | CD21 low CD38<br>low (%B) | CD21 low CD38<br>low (B mm3) |
|--------------------|-----------------------------|---------------------|---------------------------|------------------------------|
| 20-33 yo           | 18                          | 10/8                | 4<br>(0.3-11)             | 10<br>(1-26)                 |
| 1-17 yo            | 10                          | 6/4                 | 4<br>(0.5-17)             | 22<br>(3-33)                 |

Values within parenthesis represent median (5th-95th percentile range).

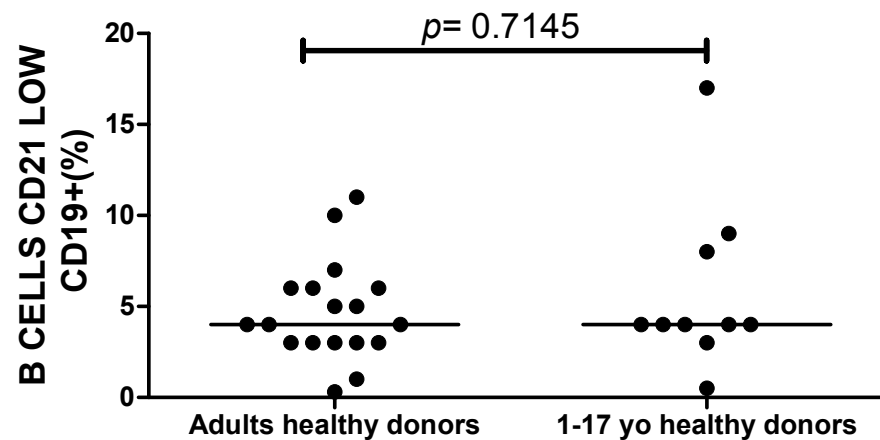

**Supplementary figure 2** . Expression in percentages of CD21<sup>low</sup> B cell subpopulation. Bars show the median; The results does not show significant differences between these two groups.
